# Supplementary material
Source: Springer Nature journal article supplement (https://www.springermedizin.de/resource/supplementary/12885_2011_3020_MOESM12_ESM.pdf/9462640)

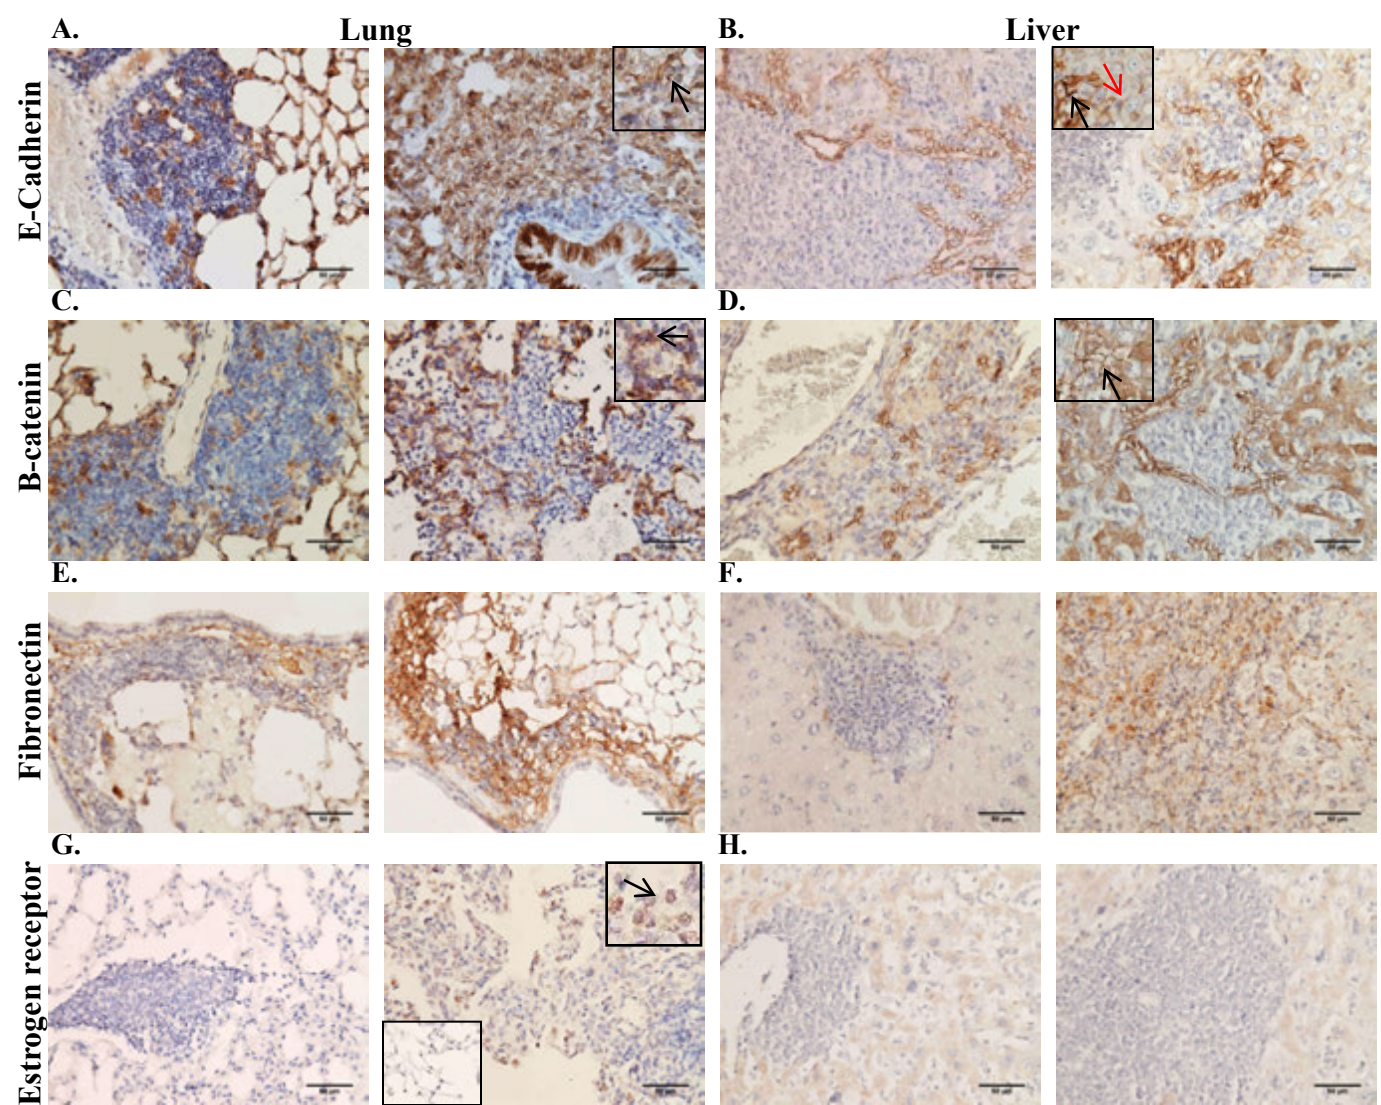

Supplement: MOESM12 [file 9462640]
